# Supplementary material for: A Review on Coordination Properties of Thiol-Containing Chelating Agents Towards Mercury, Cadmium, and Lead
Source: PubMed Central journal article supplement (PMC6767255; doi:10.3390/molecules24183247), 2019-09-06

**Table 1S.** Structures of the ligands. Hydrogen in light grey, carbon in grey, nitrogen in blue, sulfur in yellow and oxygen in red. Coordinates obtained from the Cambridge Structural Database, image created with Mercury3.5.

| CCDC-Refcode<br>Reference                                                                                                                                                          | Structures                                                                          | Ligand |  |
|------------------------------------------------------------------------------------------------------------------------------------------------------------------------------------|-------------------------------------------------------------------------------------|--------|--|
| <p style="text-align: center;"><b>BECVUC</b></p> <p>K. Igawa, N. Yoshinari, T. Konno, Acta Crystallogr., Sect. C: Cryst. Struct. Commun. 68 (2012) 6332</p>                        | 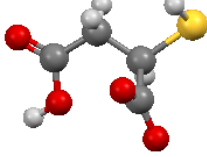   | TMA    |  |
| <p style="text-align: center;"><b>JUBFER</b></p> <p>G.J.Pyrka, N.Scott, Q.Fernando, Acta Crystallogr., Sect. C: Cryst. Struct. Commun. 48 (1992) 2007</p>                          |    | DMSA   |  |
| <p style="text-align: center;"><b>CEDFAS</b></p> <p>H.E. Howard-Lock, C.J.L. Lock, P.S. Smalley, J. Crystallogr. Spectrosc. Res., 13 (1983) 333</p>                                |  | DPEN   |  |
| <p style="text-align: center;"><b>HAXJIB</b></p> <p>C.-P.Racz, G.Borodi, M.M.Pop, I.Kacso, S.Santa, M.Tomoaia-Cotisel, Acta Crystallogr., Sect. B: Struct. Sci., 68 (2012) 164</p> |  | LA     |  |

**Table 2S.** Structures of  $\text{Hg}^{2+}$  with different ligands bearing mercapto groups. Hydrogen in light grey, carbon in grey, nitrogen in blue, sulfur in yellow, oxygen in red and mercury in light blue. Coordinates obtained from the Cambridge Structural Database, image created with Mercury3.5.

| CCDC-Refcode<br>Reference                                                                                                                                              | $\text{Hg}^{2+}$ Structures                                                         | Complex        | Ligand                                                           |
|------------------------------------------------------------------------------------------------------------------------------------------------------------------------|-------------------------------------------------------------------------------------|----------------|------------------------------------------------------------------|
| AQON0J<br>J.M. Bramlett, Hee-Jung Im, Xiang-Hua Yu, Tianniu Chen, Hu Cai, L.E. Roecker, C.E. Barnes, Sheng Dai, Zi-Ling Xue, <i>Inorg. Chim. Acta</i> , 317 (2004) 243 | 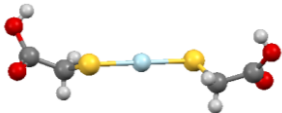   | $\text{HgL}_2$ | TGA<br><br>$\text{COOHCH}_2\text{-SH}$                           |
| BEPQAO<br>G.G. Hoffmann, I. Steinfatt, W. Brockner, V. Kaiser, <i>Z. Naturforsch. B:Chem.Sci.</i> , 54 (1999) 887                                                      |    | $\text{HgL}_2$ | $\text{CH}_3(\text{CH}_2)_3\text{CH}_2\text{SH}$                 |
| CAYFUD<br>Z. Popovic, D. Matkovic-Calogovic, J. Hasic, M. Sikirica, D. Vikić-Topić, <i>Croat. Chem. Acta</i> , 72 (1999) 279                                           |   | $\text{HgL}_2$ | $\text{HCOO-CH}_2\text{-NH-CO-CH-}$<br>$(\text{CH}_3)\text{-SH}$ |
| HAYQEE<br>H.Fleischer, Y.Dienes, B.Mathiasch, V.Schmitt, D.Schollmeyer, <i>Inorg. Chem.</i> , 44, (2005) 8087                                                          |  | $\text{HgL}_2$ | $\text{NH}_2\text{-CH}_2\text{-CH}_2\text{-SH}$                  |
| MERSET01<br>K.A. Fraser, W. Clegg, D.C. Craig, M.L. Scudder, I.G. Dance, <i>Acta Crystallogr. Sect.C:Cryst. Struct. Commun.</i> , 51 (1995) 406                        |  | $\text{HgL}_2$ | $\text{CH}_3\text{-CH}_2\text{-SH}$                              |
| AHOQOE<br>Kuan-Yi Wu, Chang-Chih Hsieh, Yih-Chern Horng, <i>J.Organomet.Chem.</i> , 694 (2009) 2085                                                                    |  | $\text{HgL}_2$ | $\text{R-CH}_2\text{-NH-CH}_3\text{-CH}_2\text{-SH}$             |

|                                                                                                                          |                                                                                     |                                |                                                                                       |
|--------------------------------------------------------------------------------------------------------------------------|-------------------------------------------------------------------------------------|--------------------------------|---------------------------------------------------------------------------------------|
| <p><b>MECBHG</b></p> <p>C. Perchard, G. Zuppiroli, P. Gouzerh, Y. Jeannin, F. Robert, J. Mol. Struct., 72 (1981) 119</p> | 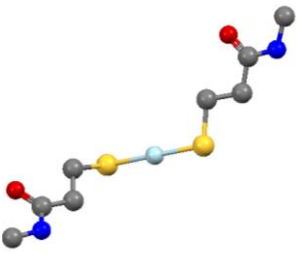   | HgL <sub>2</sub>               | CH <sub>3</sub> -NH-CO-CH <sub>2</sub> -CH <sub>2</sub> -SH                           |
| <p><b>MERMES</b></p> <p>D.C. Bradley, N.R. Kunchur, J. Chem. Phys., 40 (1964) 2258</p>                                   |    | HgL <sub>2</sub>               | CH <sub>3</sub> -SH                                                                   |
| <p><b>TEVQOA01</b></p> <p>R.D.Schluter, G.Krauter, W.S.Rees Junior, J.Cluster Sci., 8 (1997) 123</p>                     |    | HgL <sub>2</sub>               | Φ-CH <sub>2</sub> -SH                                                                 |
| <p><b>VOLFOR</b></p> <p>I. Casals, P. Gonzalez-Duarte, W. Clegg, Inorg. Chim. Acta, 184 (1991) 167</p>                   |  | HgL <sub>2</sub>               | N(CH <sub>3</sub> ) <sub>3</sub> -CH <sub>2</sub> -CH <sub>2</sub> -CH <sub>2</sub> S |
| <p><b>XIJKOQ</b></p> <p>Chong-Hyeak Kim, S. Parkin, M. Bharara, D. Atwood, Polyhedron, 21 (2002) 225</p>                 |  | HgL <sub>2</sub>               | NH <sub>3</sub> -CH <sub>2</sub> -CH <sub>2</sub> S                                   |
| <p><b>DAXPUN</b></p> <p>G. Henkel, P. Betz, B. Krebs, Chem. Comm.,(1985) 1498</p>                                        |  | Hg <sub>3</sub> L <sub>4</sub> | HS-CH <sub>2</sub> -CH <sub>2</sub> -SH                                               |
| <p><b>WACXAZ</b></p> <p>N. Govindaswamy, J. Moy, M. Millar, S.A. Koch, Inorg. Chem., 91 (1992) 5343</p>                  |  | HgL <sub>2</sub>               | C <sub>6</sub> H <sub>12</sub> S <sub>2</sub>                                         |

**Table 3S.** Structures of Cd<sup>2+</sup> with different ligands bearing mercapto groups. Hydrogen in light grey, carbon in grey, nitrogen in blue, sulfur in yellow, oxygen in red, cadmium in pink and chloride in green. Coordinates obtained from the Cambridge Structural Database, image created with Mercury3.5.

| CCDC-Refcode<br>Reference                                                                                             | Cd <sup>2+</sup> Structures                                                         | Complex                        | Ligand                                                    |
|-----------------------------------------------------------------------------------------------------------------------|-------------------------------------------------------------------------------------|--------------------------------|-----------------------------------------------------------|
| CAHGUN<br><br>I.G.Dance, M.L.Scudder, R.Secomb, <i>Inorg. Chem.</i> , 22 (1983) 1794                                  | 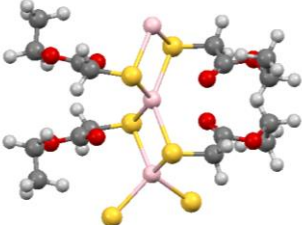   | Cd <sub>3</sub> L <sub>6</sub> | CH <sub>3</sub> -CH <sub>2</sub> -O-CO-CH <sub>2</sub> SH |
| DETHOZ<br><br>A.D. Watson, C.P. Rao, J.R. Dorfman, R.H. Holm, <i>Inorg. Chem.</i> , 24 (1985) 2820                    |   | Cd <sub>2</sub> L <sub>6</sub> | CH <sub>3</sub> -CH <sub>2</sub> -SH                      |
| DUFZAF<br><br>C.P. Rao, J.R. Dorfman, R.H. Holm. <i>Inorg. Chem.</i> , 25 (1986) 428                                  |  | CdL <sub>2</sub>               | SH-CH <sub>2</sub> .CH <sub>2</sub> -SH                   |
| HAZGAR<br><br>H. Fleischer, Y. Dienes, B. Mathiasch, V. Schmitt, D. Schollmeyer, <i>Inorg. Chem.</i> , 44 (2005) 8087 |  | CdL <sub>2</sub>               | SH-CH <sub>2</sub> .CH <sub>2</sub> -NH <sub>2</sub>      |
| HEQMAT<br><br>U. Florke, CSD Communication (Private Communication), 2013                                              |  | Cd <sub>2</sub> L <sub>6</sub> | (CH <sub>3</sub> ) <sub>2</sub> -CH-SH                    |

|                                                                                                                                                                                                                |                                                                                    |                                          |                                                                           |
|----------------------------------------------------------------------------------------------------------------------------------------------------------------------------------------------------------------|------------------------------------------------------------------------------------|------------------------------------------|---------------------------------------------------------------------------|
| <p style="text-align: center;"><b>JIZWIY</b></p> <p>I. Casals, P. Gonzalez-Duarte, W. Clegg, C. Foces-Foces, F.H. Cano, M. Martinez-Ripoll, M. Gomez, X. Solans, J. Chem. Soc., Dalton Trans., (1991) 2511</p> | 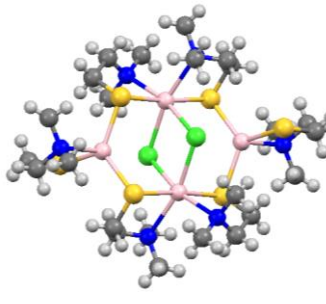  | $\text{Cd}_4\text{L}_6\text{Cl}_2$       | $(\text{CH}_3)_2\text{-N-CH-CH}_2\text{-SH}$                              |
| <p style="text-align: center;"><b>TUQREC</b></p> <p>H. Strasdeit, A. von Dollen, A.-K. Duhme, Z. Naturforsch., B:Chem.Sci., 52 (1997) 17</p>                                                                   |   | $\text{CdL}_2 \cdot 2\text{H}_2\text{O}$ | Lipoic acid                                                               |
| <p style="text-align: center;"><b>WACXED</b></p> <p>N. Govindaswamy, J. Moy, M. Millar, S.A. Koch, Inorg. Chem., 31 (1992) 5343</p>                                                                            |   | $\text{CdL}_2$                           | Cicloesene-(SH) <sub>2</sub>                                              |
| <p style="text-align: center;"><b>XICZEO</b></p> <p>M. Mikuriya, Xiao Jian, S. Ikemi, T. Kawahashi, H. Tsutsumi, A. Nakasone, Jong-Wan Lim, Inorg. Chim. Acta, 312 (2001) 183</p>                              |  | $\text{Cd}_3\text{L}_4$                  | $\text{NH}_2\text{-CH}_2\text{CH}_2\text{CH}_2\text{NHCH-CH}_2\text{-SH}$ |

**Table 4S.** Structures of  $\text{Pb}^{2+}$  with different ligands bearing mercapto groups. Hydrogen in light grey, carbon in grey, nitrogen in blue, sulfur in yellow, oxygen in red, lead in light green and chloride in green. Coordinates obtained from the Cambridge Structural Database, image created with Mercury3.5.

| CCDC-Refcode Reference                                                                                                              | $\text{Pb}^{2+}$ Structures                                                         | Complex                        | Ligand                                                               |
|-------------------------------------------------------------------------------------------------------------------------------------|-------------------------------------------------------------------------------------|--------------------------------|----------------------------------------------------------------------|
| DISWIL<br>P.A.W.Dean, J.J.Vittal, N.C.Payne, Inorg. Chem., 24 (1985) 3594                                                           | 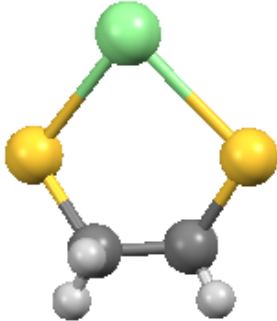   | PbL                            | HS-CH <sub>2</sub> -CH <sub>2</sub> -SH                              |
| KEJCOS<br>M.S. Bharara, S. Parkin, D.A. Atwood, Inorg. Chim. Acta, 359 (2006) 3375                                                  |  | Pb <sub>2</sub> L <sub>2</sub> | CH <sub>2</sub> SH-CH <sub>2</sub> NH <sub>2</sub>                   |
| DPENPB01<br>A.C.Schell, M.Parvez, F.Jalilehvand, Acta Crystallogr., Sect. E: Struct. Rep. Online, 68 (2012) m489                    |  | PbL                            | DPEN                                                                 |
| NUFQEL01<br>V.N. Khrustalev, R.R. Aysin, I.V. Borisova, A.S. Peregudov, L.A. Leites, N.N. Zemlyansky, Dalton Trans., 39 (2010) 9480 |  | PbL <sub>2</sub>               | HS-CH <sub>2</sub> -CH <sub>2</sub> N(CH <sub>3</sub> ) <sub>2</sub> |

**Fig. 1S.** Speciation plots of the metal complexes whose stability constants are reported in Table 3, calculated with Hyss program at metal concentration 0.001 M and ligand concentration 0.002 M.

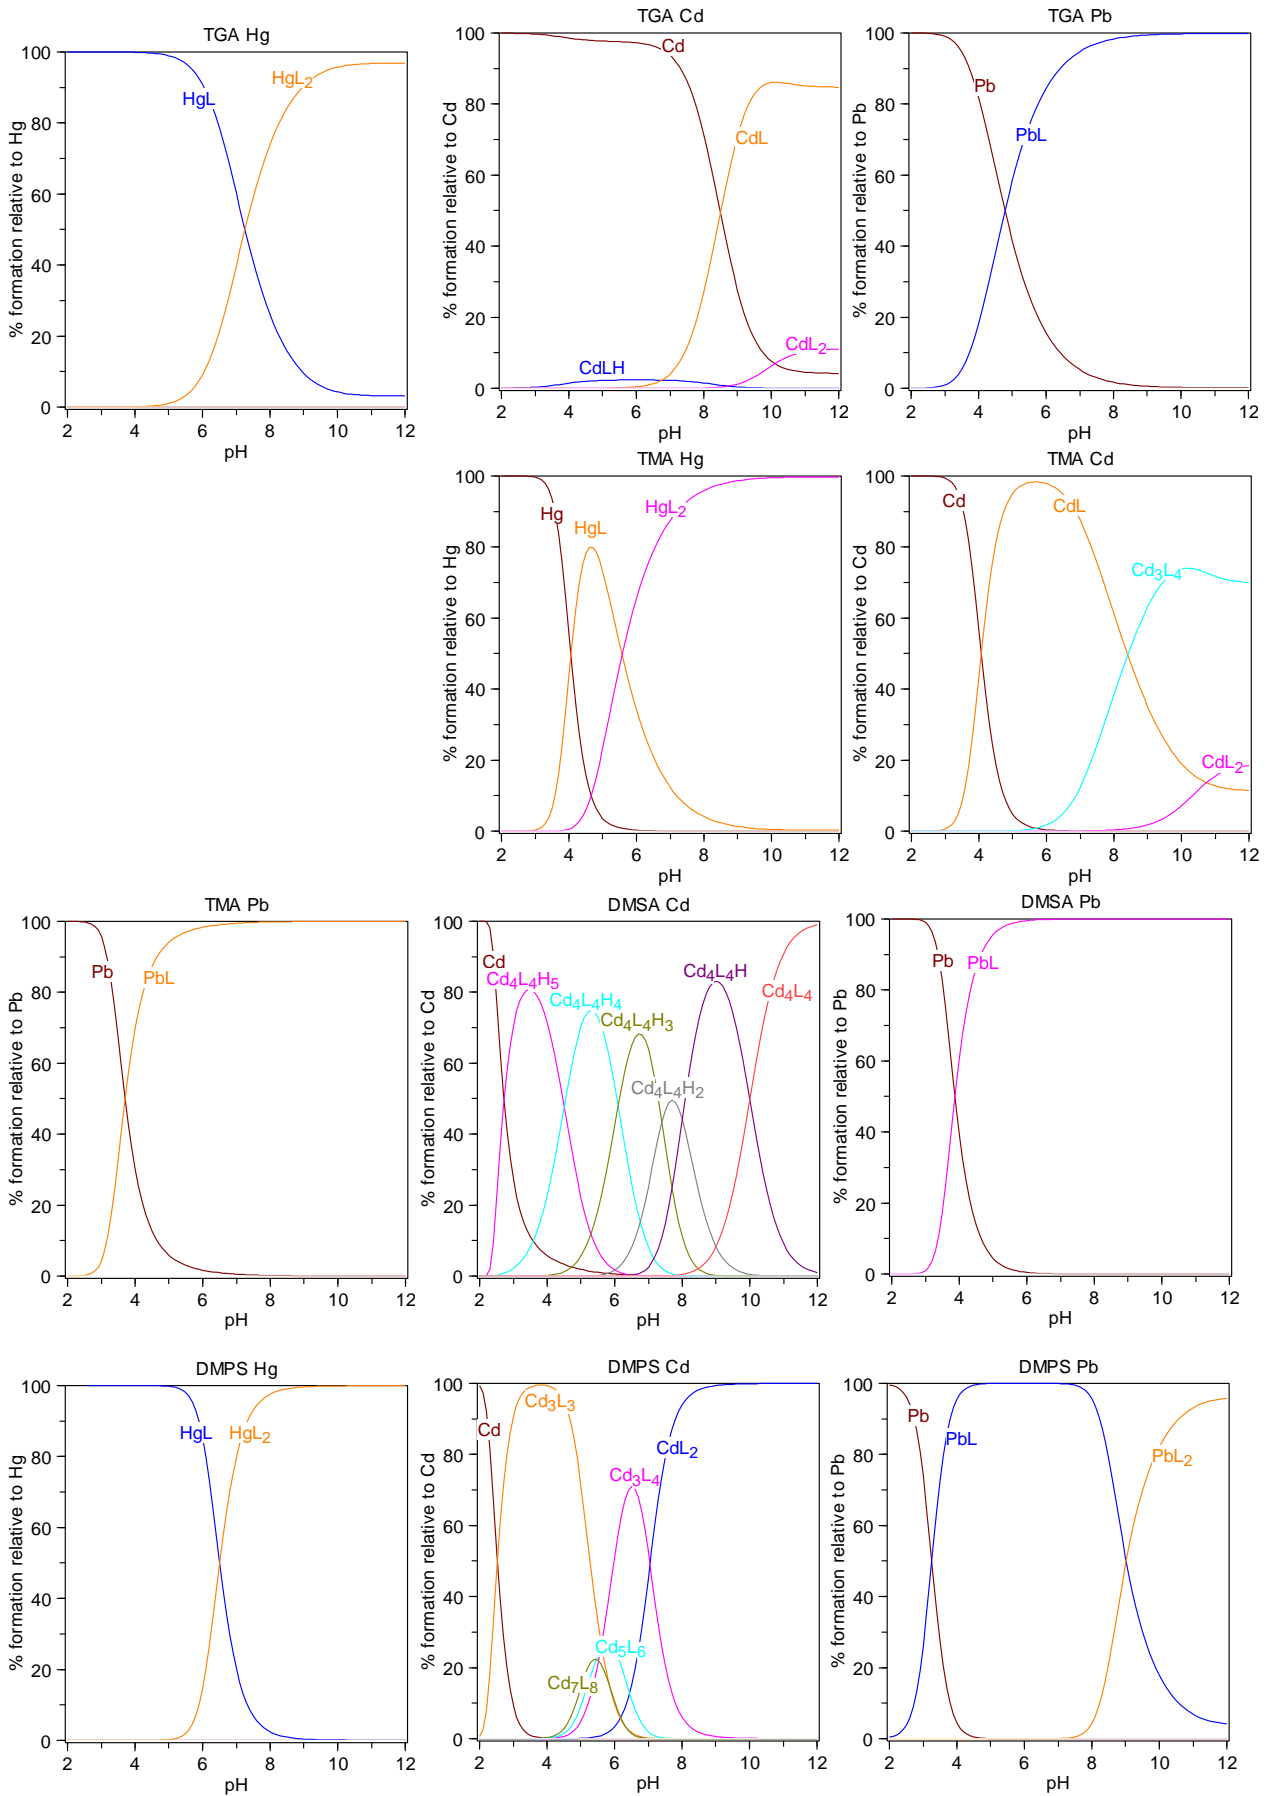

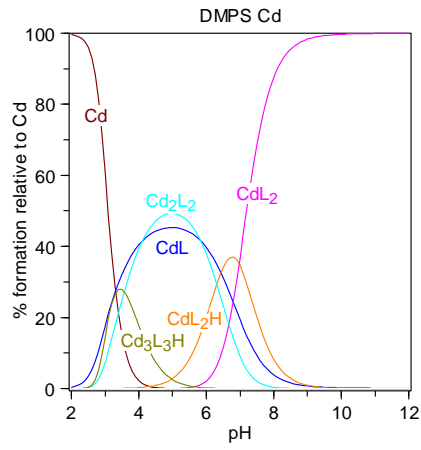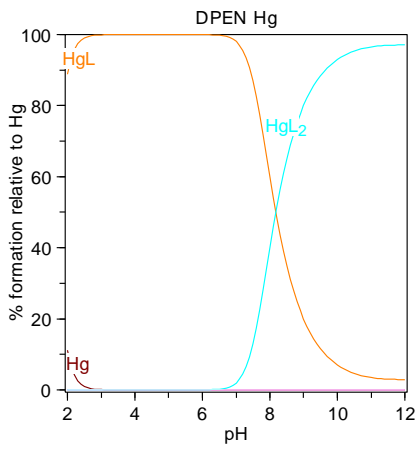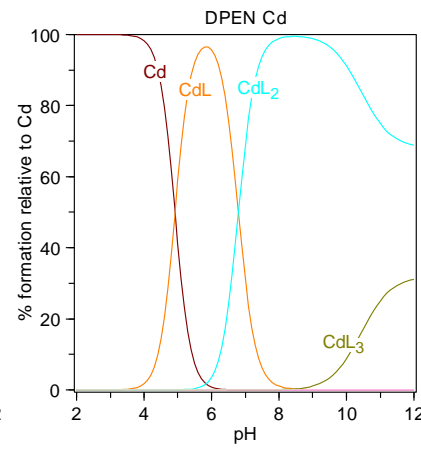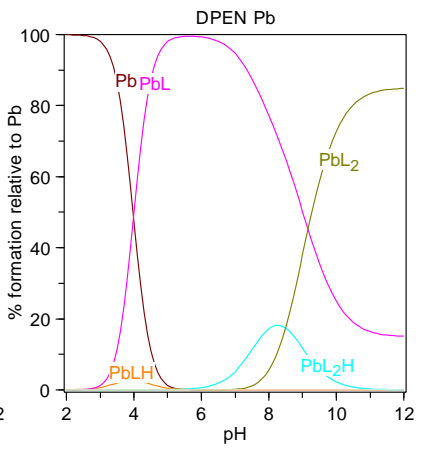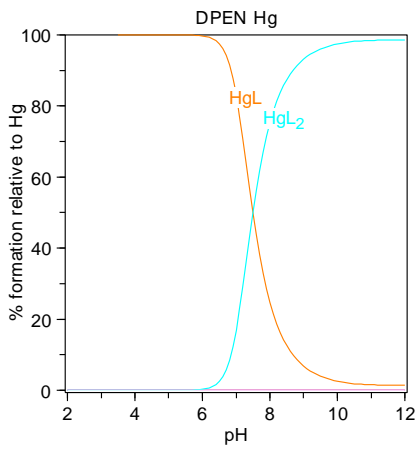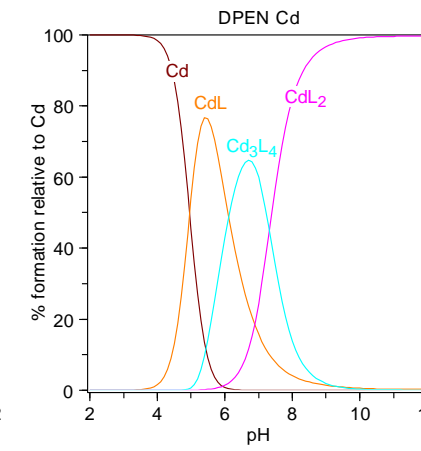

Supplement: molecules-24-03247-s001.pdf [file molecules-24-03247-s001.pdf]
